# Supplementary material for: Seasonal variation characteristics of water quality in the Sunxi River Watershed, Three Gorges Reservoir Area
Source: PeerJ journal article supplement (doi:10.7717/peerj.14233), 2022-10-12
Supplement: Sunxi_River_data.xlsx [file Sunxi_River_data.xlsx]

## Sheet: first2018.10
point	latitude	longitude			COD (mg/l)	TN (mg/l)	TP (mg/l)
1	28°37′50.04″	106°25′′1.81″	28.6306	106.417	8	0.98	0.008
2	28°38′41.02″	106°24′′27.6″	28.6447	106.408	6	0.85	0.01
3	28°39′47.42″	106°24′′2.65″	28.6632	106.401	4	1.11	0.008
4	28°40′35.89″	106°23′′51.63″	28.6766	106.398	4L	1.32	0.025
5	28°41′2.94″	106°23′′36.42″	28.6841	106.393	4L	1.56	0.029
6	28°41′44.26″	106°23′′34.16″	28.6956	106.393	4L	1.68	0.067
7	28°42′11.54″	106°23′′29.97″	28.7032	106.392	4L	0.77	0.057
8	28°42′47.6″	106°23′′12.64″	28.7132	106.387	4L	0.94	0.061
9	28°43′52.18″	106°22′′56.41″	28.7311	106.382	5	1.04	0.061
10	28°44′31.73″	106°22′′35.35″	28.7421	106.376	4L	0.86	0.033
11	28°45′15.97″	106°22′′21.52″	28.7544	106.373	4L	0.78	0.105
12	28°45′52.77″	106°21′′53.77″	28.7646	106.365	4L	0.88	0.055
13	28°46′6.77″	106°21′′36.9″	28.7685	106.36	4	0.94	0.021
14	28°48′42.02″	106°19′′40.03″	28.8117	106.328	5	1.02	0.039
15	28°49′55.5″	106°19′′12.46″	28.8321	106.32	5	1.1	0.013
16	28°50′27.7″	106°19′′25.13″	28.841	106.324	4L	1.01	0.035
17	28°51′26″	106°19′′58.74″	28.8572	106.333	4L	1.25	0.023
18	28°52′45.33″	106°20′′4.93″	28.8792	106.335	4L	0.68	0.037
19	28°53′16.25″	106°20′′48.57″	28.8878	106.347	4	0.64	0.039
20	28°53′57.93″	106°20′′41.84″	28.8994	106.345	4L	1.04	0.029
21	28°54′38.55″	106°22′′3.27″	28.9107	106.368	5	0.73	0.033
22	28°55′41″	106°22′′2.42″	28.9281	106.367	5	1.48	0.077
23	28°56′40.11″	106°22′′2.31″	28.9445	106.367	8	2.03	0.027
24	28°58′28.17″	106°20′′47.78″	28.9745	106.347	5	1.14	0.019
25	28°59′21.03″	106°20′′57.66″	28.9892	106.349	6	1.16	0.051
26	29°0′22.7″	106°19′′35.26″	29.0061	106.326	6	1.2	0.045
27	29°1′20.52″	106°19′′7.49″	29.0224	106.319	5	1.19	0.065
28	29°2′34.98″	106°18′′41.21″	29.0428	106.311	7	1.95	0.067
29	29°4′21.55″	106°19′′44.86″	29.0726	106.329	6	1.25	0.027
30	29°5′19.99″	106°19′′11.94″	29.0886	106.32	8	1.25	0.049
31	29°6′40.06″	106°18′′26.45″	29.1111	106.307	7	1.37	0.031
32	29°7′24.38″	106°18′′6.67″	29.1233	106.302	6	1.4	0.021
33	29°8′1.07″	106°17′′56.85″	29.1336	106.299	5	1.32	0.049
34	29°8′54.85″	106°17′′46.19″	29.1483	106.296	8	1.92	0.023
35	29°9′13.34″	106°16′′45.38″	29.1537	106.279	14	1.31	0.049
36	29°10′7.1″	106°16′′47.7″	29.1686	106.28	8	1.39	0.027
37	29°9′47.94″	106°18′′7.81″	29.1633	106.302	9	1.47	0.031
38	29°9′49.94″	106°19′′40.96″	29.1636	106.328	5	1.73	0.038
39	29°11′0.3″	106°20′′19.64″	29.1833	106.339	4	1.64	0.041
40	29°11′48.92″	106°21′′4.72″	29.1969	106.351	5	1.76	0.046

## Sheet: second2019.05
point	latitude	longitude			COD (mg/l)	TN (mg/l)	TP (mg/l)
1	28°37′50.39″	106°25′2.32″	28.6307	106.417	5	1.26	0.0074176
2	28°38′41.32″	106°24′27.66″	28.6448	106.408	7	1.18	0.0074176
3	28°39′47.98″	106°24′2.74″	28.6633	106.401	5	2	0.037088
4	28°40′36.10″	106°23′51.85″	28.6767	106.398	11	1.67	0.037088
5	28°41′2.71″	106°23′36.52″	28.6841	106.393	5	1.57	0.0445056
6	28°41′44.77″	106°23′34.25″	28.6958	106.393	5	1.61	0.0593408
7	28°42′11.91″	106°23′28.14″	28.7033	106.391	4L	1.12	0.0667584
8	28°42′47.52″	106°23′12.81″	28.7132	106.387	4	1.16	0.0222528
9	28°43′52.03″	106°22′56.70″	28.7311	106.382	4L	1.12	0.0296704
10	28°44′31.80″	106°22′35.20″	28.7422	106.376	5	1.06	0.0148352
11	28°45′20.23″	106°22′18.97″	28.7556	106.372	6	1.16	0.0222528
12	28°45′53.42″	106°21′52.09″	28.7648	106.364	4	1.3	0.0890112
13	28°46′24.43″	106°21′28.80″	28.7735	106.358	9	1.38	0.170605
14	28°48′42.35″	106°19′39.89″	28.8118	106.328	6	1.01	0.0148352
15	28°49′55.76″	106°19′12.79″	28.8322	106.32	4	1.06	0.0148352
16	28°50′22.14″	106°19′23.87″	28.8395	106.323	7	0.91	0.0222528
17	28°51′23.97″	106°19′53.41″	28.8567	106.332	6	1.13	0.074176
18	28°52′45.11″	106°20′5.47″	28.8792	106.335	8	1.38	0.111264
19	28°53′15.59″	106°20′48.11″	28.8877	106.347	8	1.7	0.148352
20	28°53′59.61″	106°20′42.3″	28.8999	106.345	5	1.35	0.178022
21	28°54′38.58″	106°22′3.31″	28.9107	106.368	9	1.25	0.140934
22	28°55′40.58″	106°22′2.28″	28.9279	106.367	5	1.44	0.0667584
23	28°56′36.49″	106°22′4.89″	28.9435	106.368	4	1.4	0.133517
24	28°58′27.76″	106°20′48.17″	28.9744	106.347	6	1.51	0.163187
25	28°59′21.10″	106°20′56.82″	28.9892	106.349	7	1.55	0.126099
26	29°0′22.16″	106°19′36.28″	29.0062	106.327	6	1.88	0.200275
27	29°1′21.03″	106°19′7.01″	29.0225	106.319	5	1.6	0.192858
28	29°2′34.58″	106°18′41.85″	29.0429	106.312	7	0.88	0.192858
29	29°4′21.56″	106°19′44.93″	29.0727	106.329	5	1.93	0.178022
30	29°5′20.58″	106°19′12.19″	29.0891	106.32	7	1.8	0.148352
31	29°6′40.90″	106°18′26.95″	29.1114	106.307	8	1.72	0.103846
32	29°7′24.04″	106°18′5.5″	29.1233	106.302	7	1.8	0.126099
33	29°8′1.2″	106°17′56.96″	29.1337	106.299	6	1.93	0.133517
34	29°8′54.43″	106°17′46.28″	29.1485	106.296	6	1.4	0.0445056
35	29°9′11.89″	106°16′48.72″	29.1533	106.28	6	1.12	0.0222528
36	29°10′6.82″	106°16′47.51″	29.1686	106.28	12	1.96	0.0222528
37	29°9′47.33″	106°18′7.14″	29.1631	106.302	15	1.97	0.0593408
38	29°9′51.07″	106°19′42.55″	29.1642	106.328	4L	1.72	0.0445056
39	29°10′59.67″	106°20′20.02″	29.1832	106.339	10	1.86	0.0296704
40	29°11′58.99″	106°20′50.71″	29.1997	106.347	4	1.29	0.037088
	28°47′32.21″	106°20′21.99″	28.7923	106.339	10	1.17	0.037088
	29°3′16.27″	106°19′50.06″	29.0545	106.331	6	1.44	0.18544
	29°12′49.91″	106°21′29.62″	29.2139	106.358	6	1.68	0.178022
	29°13′52.40″	106°21′58.65″	29.2312	106.366	4	2.94	0.18544

## Sheet: third
		point	latitude	longitude			water temperature (℃)	pH	EC (µs/cm)	DO (mg/l)	COD (mg/l)	TN (mg/l)	TP (mg/l)
1	1	1	28°37′50.26″	106°25′2.19″	28.6306	106.417	26.1	8.15	75.3	7.3	12	0.95	0.0538507
2	2	2	28°38′41.6″	106°24′27.32″	28.6449	106.408	21.99	7.1	68.5	5.8	10	1.34	0.0639477
3	3	3	28°39′47.37″	106°24′2.56″	28.6632	106.401	23.9	7.81	117.1	6.3	9	1.93	0.0572163
4	4	4	28°40′35.58″	106°23′51.38″	28.6765	106.398	23.2	7.92	124.9	6.6	8	1.85	0.0370223
5	5	5	28°41′2.38″	106°23′36.25″	28.684	106.393	24.4	8.01	129.6	7	8	1.72	0.0572163
6	6	6	28°41′44.34″	106°23′33.54″	28.6957	106.393	25.7	8.05	141.2	6.6	10	1.77	0.070679
7	7	7	28°42′12.3″	106°23′27.55″	28.7034	106.391	26.3	8.13	119.3	6.3	6	1.25	0.0538507
8	8	8	28°42′47.15″	106°23′12.3″	28.7131	106.387	23.9	8.35	123.3	6.3	8	1.05	0.0841417
9	9	9	28°43′51.42″	106°22′56.49″	28.7309	106.382	23.8	8.02	95.9	6.9	13	1.07	0.0774103
10	10	10	28°44′31.43″	106°22′35.1″	28.7421	106.376	24	7.88	101	6.9	12	1.32	0.10097
11	11	11	28°45′21.11″	106°22′17.52″	28.7559	106.372	23.9	7.91	102.3	6.6	14	1.26	0.060582
12	12	12	28°45′53.32″	106°21′52.41″	28.7648	106.365	24	8.01	114.3	6.8	14	1.18	0.0774103
13	13	13	28°46′24.26″	106°21′28.48″	28.7734	106.358	25.8	7.81	102.4	5.5	20	1.2	0.0942387
15	15	14	28°48′42.14″	106°19′40.2″	28.8117	106.328	27.2	8.1	125.4	6.6	8	1.3	0.0336567
17	16	15	28°49′55.34″	106°19′12.36″	28.832	106.32	26.7	7.92	132.9	6.7	10	1.6	0.060582
18	17	16	28°50′22.17″	106°19′23.31″	28.8395	106.323	26.9	7.97	124.4	7.2	8	1.6	0.10097
19	18	17	28°51′23.49″	106°19′53.3″	28.8565	106.331	26.9	7.95	128.1	6.4	8	1.63	0.050485
21	19	18	28°52′45.53″	106°20′4.48″	28.8793	106.335	25	8.1	145.9	5.9	10	0.72	0.060582
22	20	19	28°53′16.35″	106°20′48.17″	28.8879	106.347	25	7.96	149.8	6.3	8	0.84	0.0875073
23	21	20	28°53′58.22″	106°20′43.17″	28.8995	106.345	25.4	7.83	150.5	6.7	10	0.85	0.161552
24	22	21	28°54′38.51″	106°22′3.29″	28.9107	106.368	25.5	7.84	158.7	6.6	9	0.89	0.090873
26	23	22	28°55′47″	106°22′4.3″	28.9297	106.368	26.9	7.88	165.8	5.6	9	1.15	0.104336
25	24	23	28°56′36.35″	106°22′4.57″	28.9434	106.368	26.5	7.83	143.1	6.7	12	1.23	0.0673133
28	25	24	28°58′27.51″	106°20′48.11″	28.9743	106.347	26.7	7.68	146	6.1	10	1.27	0.0538507
27	26	25	28°59′21.29″	106°20′57.22″	28.9892	106.349	27	7.79	144.7	5.9	11	1.18	0.0740447
29	27	26	29°0′22.8″	106°19′36.39″	29.0063	106.327	26.5	7.28	137.4	6.2	11	1.26	0.0370223
30	28	27	29°1′21.1″	106°19′7″	29.0225	106.319	26.9	7.87	137.1	6.5	10	1.5	0.0437537
31	29	28	29°2′34.32″	106°18′41.42″	29.0429	106.312	27.9	7.89	158.1	6.5	10	1.69	0.0875073
33	31	29	29°4′21.54″	106°19′45.1″	29.0726	106.329	27.7	7.86	168.5	6.1	11	1.87	0.121164
34	32	30	29°5′20.16″	106°19′11.36″	29.0889	106.32	27.1	7.87	169.4	5.6	10	1.63	0.151455
35	33	31	29°6′40.53″	106°18′26.57″	29.1113	106.307	27.7	7.83	178.1	5.9	10	1.67	0.175015
36	34	32	29°7′23.52″	106°18′5.57″	29.1232	106.302	27.6	7.79	179.4	5.1	9	1.13	0.121164
37	35	33	29°8′0.49″	106°17′56.3″	29.1335	106.299	28	7.69	172.9	5.5	11	1.06	0.114433
40	36	34	29°8′55.5″	106°17′46.29″	29.1487	106.296	28.9	7.76	173.3	6	7	1.44	0.0774103
41	37	35	29°9′13.34″	106°16′45.31″	29.1537	106.279	29.7	7.83	178.6	5.7	9	1	0.0740447
42	38	36	29°10′6.41″	106°16′47.28″	29.1684	106.28	29.2	7.9	183.8	6.2	7	0.95	0.050485
39	39	37	29°9′47.47″	106°18′7.45″	29.1632	106.302	28.1	7.77	194	5.7	7	1.25	0.17838
38	40	38	29°9′50.8″	106°19′41.7″	29.1641	106.328	28.2	7.81	201	5.3	8	1.28	0.107701
43	41	39	29°10′59.39″	106°20′20.1″	29.1832	106.339	29.7	7.96	198.8	6.1	7	1.17	0.181746
44	42	40	29°11′58.34″	106°20′50.2″	29.1995	106.347	29	7.78	203	5.5	8	1.39	0.148089
14	14		28°47′32.12″	106°20′21.59″	28.7923	106.339	27.6	5.9	107.96	23.8	17	1.46	0.080776
32	30		29°3′11.5″	106°19′42.1″	29.0532	106.328	27.5	7.9	168	6.1	10	1.5	0.0841417
45	43		29°12′49.52″	106°21′28.59″	29.2138	106.358	29	7.64	269	5.8	10	1.43	0.188477
46	44		29°13′52.7″	106°21′58.2″	29.2313	106.366	29.1	7.87	334	5	6	1.18	0.191843
49	45		28°46′33.36″	106°18′56.6″	28.7759	106.316	25.6	7.83	118.6	5.5	6	1.28	0.181746
48	46		28°48′21.8″	106°16′42.5″	28.8061	106.278	26.1	8	181	5.5	5	1.13	0.185112
16	47		28°49′19.43″	106°18′41.25″	28.8221	106.311	28	7.82	135.5	6.8	9	1.46	0.0538507
47	48		28°45′26.29″	106°25′22.35″	28.7573	106.423	25.7	7.89	158.6	6.3	5	1.56	0.148089
50	49		28°48′51.2″	106°22′14.42″	28.8142	106.371	27.2	7.98	208	5.4	8	2	0.168283
20	50		28°51′5.22″	106°20′36.56″	28.8514	106.343	30	8.18	239	5.7	9	1.31	0.0639477
51	51		28°55′37.27″	106°18′38.18″	28.927	106.311	26.5	8.03	248	6.2	6	2.09	0.168283
52	52		28°57′51.15″	106°17′30.2″	28.9642	106.292	33.5	7.94	144	5	13	1.96	0.185112
53	53		28°59′27.33″	106°15′48.47″	28.9909	106.263	30.8	7.98	244	6	4	1.65	0.127895

## Sheet: fourth2019.11
	point	latitude	longitude			water temperature (℃)	pH	EC (µs/cm)	DO (mg/l)	COD (mg/l)	TN (mg/l)	TP (mg/l)
1	1	28°37'50.21"	106°25'2.28"			17.2	7.3	77	5.8	14	1.1	0.009
2	2	28°38'41.3"	106°24'27.48"			16.6	7.31	79.4	5.9	10	1.01	0.007
3	3	28°39'47.35"	106°24'3.1"			14.8	8.3	178.6	7.9	10	1.29	0.014
4	4	28°40'36.0"	106°23'51.38"			14.7	8.24	167.2	8.1	7	1.4	0.01
5	5	28°41'3.3"	106°23'37.19"			15.1	8.17	167.6	7.5	7	1.35	0.013
6	6	28°41'44.49"	106°23'33.48"			15.4	8.2	180.4	7.6	8	1.23	0.016
7	7	28°42'12.13"	106°23'28.35"			15.8	8.11	121.3	7.9	6	0.87	0.011
8	8	28°42'47.10"	106°23'12.57"			16	8.31	204	8	10	1.04	0.009
9	9	28°43'51.21"	106°22'56.34"			16.8	8.34	153.5	7.4	6	1.04	0.018
10	10	28°44'17.19"	106°22'48.16"			16.8	8.5	174	7.3	4	0.84	0.004
11	11	28°45'15.35"	106°22'21.26"			16.8	8.44	178.8	8.5	5	0.99	0.009
12	12	28°45'53.23"	106°21'52.50"			17.6	8.23	199.5	7.2	5	0.88	0.009
13	13	28°46'20.6"	106°21'30.20"			17.1	8.27	204	7	4L	0.9	0.009
15	14	28°48'42.22"	106°19'40.32"			16.6	8.08	116	7.6	7	1.13	0.007
16	15	28°49'55.30"	106°19'12.59"			16.6	8.02	133.8	7.4	6	1.07	0.005
17	16	28°50'22.0"	106°19'24.19"			16.1	8.01	130.7	7.7	6	1.17	0.043
18	17	28°51'23.59"	106°19'53.1"			16.6	8	132.6	7.6	7	1.08	0.006
19	18	28°52'45.36"	106°20'4.56"			16.6	8.03	166.4	7.5	6	1.13	0.007
20	19	28°53'15.33"	106°20'48.24"			16.7	8.02	166.4	7.6	6	1.06	0.012
21	20	28°53'59.9"	106°20'44.6"			16.8	8.03	163.7	7.6	6	0.96	0.011
22	21	28°54'38.18"	106°22'3.30"			17.4	7.95	163.4	8.1	10	0.93	0.011
23	22	28°55'47.31"	106°22'4.25"			16.9	7.95	172.2	7.3	6	0.89	0.05
24	23	28°56'36.19"	106°22'4.56"			17.5	7.95	176	7	5	1.12	0.006
25	25	28°59'20.55"	106°20'56.47"			17.5	7.93	194.3	6.8	4L	0.98	0.006
26	24	28°58'27.33"	106°20'47.40"			17.9	7.89	186	6.7	4L	1	0.008
27	26	29°0'21.58"	106°19'36.13"			18.3	8.03	210	7.2	4L	1.05	0.012
28	27	29°1'20.9"	106°19'7.2"			19	8.02	210	7.7	4L	1.08	0.018
29	28	29°2'30.34"	106°18'39.47"			19.8	7.84	220	7.4	4L	1.15	0.011
31	29	29°4'21.39"	106°19'45.0"			18.9	7.83	218	7.1	4L	1.13	0.041
32	30	29°5'19.58"	106°19'12.10"			18.8	7.92	223	7	6	1.07	0.011
33	31	29°6'40.43"	106°18'27.14"			18.7	7.87	218	6.8	4L	1.37	0.007
34	32	29°7'23.42"	106°18'6.0"			19.2	8.18	213	8	4	1.65	0.008
35	33	29°8'0.43"	106°17'56.34"			19.2	7.91	210	8	4L	1.17	0.005
36	34	29°8'54.25"	106°17'46.23"			18.5	8.22	213	7.6	4L	1.15	0.015
37	36	29°10'7.13"	106°16'47.23"			17.8	8.21	231	7.7	4	1.47	0.009
38	35	29°9'13.31"	106°16'45.24"			18	7.99	227	7.2	4	1.25	0.009
39	37	29°9'47.51"	106°18'7.30"			18.1	8.16	233	7.6	4	1.17	0.01
40	38	29°9'49.59"	106°19'40.55"			17.9	8	236	7.3	4	1.39	0.012
41	39	29°10'59.40"	106°20'20.19"			18	8.01	240	7.4	5	1.38	0.013
42	40	29°11'58.55"	106°20'50.45"			18	8	242	7.3	4	1.53	0.008
43		29°12'50.34"	106°21'29.34"			18	8.1	310	7.3	4L	1.58	0.011
44		29°13'52.27"	106°21'58.56"			18.5	8.13	344	7.5	4L	1.53	0.01
14		28°47'32.49"	106°20'22.5"			15.8	8.29	197.2	7.5	4	0.87	0.027
30		29°3'16.27"	106°19'49.52"			18.5	7.82	224	7	4L	1.06	0.01

## Sheet: fifth2020.09
	point	latitude	longitude			water temperature (℃)	pH	EC (µs/cm)	DO (mg/l)	COD (mg/l)	TN (mg/l)	TP (mg/l)
1	1	28°37′50.19″	106°25′2.49″			21.5	8.66	69.4	6	4L	0.93	0.05
2	2	28°38′41.14″	106°24′27.68″			21.2	7.5	63.2	4.5	4L	0.9	0.04
3	3	28°39′48.64″	106°24′2.29″			22.1	8.26	207	6.1	4L	2.39	0.13
4	4	28°40′35.92″	106°23′51.86″			23.3	8.47	238	6.4	4L	5.49	0.13
5	5	28°41′2.98″	106°23′36.62″			23.8	8.58	235	6.8	4L	2.43	0.09
6	6	28°41′44.73″	106°23′34.85″			24.5	8.38	242	6.7	4L	2.22	0.05
7	7	28°42′11.87″	106°23′28.24″			23.6	8.19	108.6	6.4	4L	0.98	0.04
8	8	28°42′48.22″	106°23′12.17″			25.2	8.41	166.3	7.1	4L	0.87	0.03
9	9	28°43′50.08″	106°22′58.33″			28	8.21	133.4	6	4L	0.96	0.04
10	10	28°44′16.76″	106°22′52.92″			29.6	8.63	151.9	5.9	4L	0.94	0.03
11	11	28°45′15.26″	106°22′21.26″			33.9	8.67	159.6	5.7	4L	0.81	0.04
12	12	28°45′57.01″	106°21′46.84″			31.1	8.71	156.9	6.2	4L	0.66	0.04
13	13	28°46′20.20″	106°21′29.21″			32.1	8.76	158.4	6.1	4L	0.61	0.04
15	14	28°48′42.42″	106°19′39.92″			27.6	8.52	89.1	7.3	4L	0.61	0.05
16	15	28°49′55.92″	106°19′12.94″			28.7	8.48	121.4	7.7	4L	0.66	0.03
17	16	28°50′21.60″	106°19′24.04″			27.7	8.49	103.3	6.6	4L	0.67	0.04
18	17	28°51′23.07″	106°19′53.82″			26.3	8.28	100.2	6	4L	0.87	0.06
19	18	28°52′45.16″	106°20′5.39″			28	8.5	122.8	5.7	4L	0.72	0.05
20	19	28°53′16.34″	106°20′47.93″			27.8	8.18	182.2	5.9	4L	1.08	0.05
21	20	28°53′58.43″	106°20′45.22″			28.8	8.43	133.4	6.4	4L	1.13	0.05
22	21	28°54′38.39″	106°22′3.55″			28.6	8.14	137.3	5.5	5	1.05	0.1
23	22	28°55′45.62″	106°22′3.34″			31.9	8.78	137.9	6.7	4	1.49	0.05
24	23	28°56′36.62″	106°22′4.68″			28.3	7.86	136.4	5.4	5	0.71	0.08
25	24	28°58′27.71″	106°20′48.05″			28.7	8.17	144.4	5.6	5	0.84	0.07
26	25	28°59′21.27″	106°20′54.33″			31.1	9.08	148.7	6.9	4L	0.92	0.06
27	26	29°0′22.31″	106°19′36.44″			30.1	8.5	152.9	5.8	4L	1	0.06
28	27	29°1′20.35″	106°19′7.57″			30.6	8.18	152.3	6.5	5	0.96	0.05
29	28	29°2′34.72″	106°18′41.51″			30.2	7.86	155.9	5.6	4L	1.08	0.07
31	29	29°4′21.67″	106°19′44.91″			32.5	8.66	162.1	6.6	4L	0.95	0.06
32	30	29°5′19.82″	106°19′11.97″			32.6	8.89	188	7.8	4L	0.92	0.06
33	31	29°6′40.76″	106°18′27.02″			32.2	8.5	193.8	6.7	4L	1.08	0.04
34	32	29°7′23.91″	106°18′5.67″			31.5	8.68	198.1	7.9	4L	1.02	0.05
35	33	29°7′57.74″	106°17′56.86″			33.7	8.74	194.7	7.2	4L	1.08	0.04
36	34	29°8′54.36″	106°17′46.09″			35.4	8.87	175.1	9.6	4L	0.96	0.16
37	35	29°9′13.61″	106°16′45.59″			29.8	9.25	198.4	6.3	4L	1.02	0.02
38	36	29°10′6.61″	106°16′47.12″			29.6	9.16	205	6.2	4	1.1	0.02
39	37	29°9′47.68″	106°18′7.18″			29.9	8.89	206	6.3	4L	1.02	0.03
40	38	29°9′50.88″	106°19′42.10″			30.5	8.82	209	4.9	4L	1.04	0.04
41	39	29°11′0.02″	106°20′20.01″			31	8.25	216	5.4	5	1.1	0.04
42	40	29°11′58.64″	106°20′50.15″			31.2	9.75	213	8.4	6	0.96	0.02
43		29°12′49.59″	106°21′29.63″			31.5	9.86	213	9.9	6	0.97	0.06
44		29°13′54.06″	106°21′59.15″			31.2	9.4	243	8.6	4L	1.14	0.04
14		28°47′32.20″	106°20′22.11″			32.4	8.78	170.4	5.8	4L	0.61	0.04
30		29°3′16.37″	106°19′49.86″			30.9	8.23	171.9	6.1	4	1.05	0.05

## Sheet: sixth2021.05
原始点	point	latitude	longitude		water temperature （℃）	pH	EC（us/cm）	DO（mg/L）	COD（mg/L）	TN（mg/L）	TP(mg/L)
1	1	28°37′50.53″	106°25′2.42″		17	8.636	364	8.9	4L	1.11	0.02
2	2	28°38′41.00″	106°24′27.68″		14.5	8.706	96.8	9	4L	1.2	0.01
3	3	28°39′48.56″	106°24′2.68″		16	8.646	224	9.4	4L	2.06	0.09
4	4	28°40′36.11″	106°23′52.35″		16	8.603	184.6	9	4L	1.82	0.02
5	5	28°41′3.96″	106°23′37.42″		16.2	8.326	174	8.5	4L	1.66	0.02
6	6	28°41′44.33″	106°23′34.04″		17.2	8.408	189.3	8.3	4L	1.76	0.04
7	7	28°42′11.46″	106°23′26.52″		17	8.379	121.9	8.7	4L	0.99	0.03
8	8	28°42′48.86″	106°23′12.10″		18.2	8.203	184.3	8.1	4L	1.05	0.04
9	9	28°43′50.07″	106°22′57.82″		17	8.408	186.4	7.9	4L	1.32	0.05
10	10	28°44′16.80″	106°22′48.10″		17.7	8.388	198.8	7.8	4L	1.58	0.05
11	11	28°45′15.41″	106°22′48.10″		18	8.203	201	7.7	4L	1.35	0.05
12	12	28°45′53.63″	106°21′53.10″		18.9	7.731	189.7	8.1	4L	1.27	0.03
13	13	28°46′18.65″	106°21′30.19″		19.2	8.471	190.4	12.6	4L	1.44	0.03
15	14	28°48′42.45″	106°19′39.73″		15.1	8.336	134.6	9.7	4L	0.98	0.01
16	15	28°49′55.97″	106°19′12.65″		18.7	8.008	136.5	8.4	5	0.98	0.01
17	16	28°50′22.22″	106°19′24.02″		22.5	7.711	132.8	8	6	1	0.01
18	17	28°51′23.33″	106°19′53.95″		20.2	7.824	134.2	8.7	4L	1.06	0.02
19	18	28°52′47.12″	106°20′5.02″		20.5	8.101	166.3	8.8	4L	1.56	0.03
20	19	28°53′15.94″	106°20′48.14″		21	7.721	172.5	8.7	4L	1.3	0.03
21	20	28°53′58.93″	106°20′43.77″		22	7.804	168.1	5.6	4L	1.18	0.05
22	21	28°54′38.35″	106°22′3.10″		19.1	8.111	167.8	6.9	8	1.15	0.04
23	22	28°55′47.31″	106°22′4.08″		21.4	8.091	193.6	8.5	7	1.19	0.04
24	23	28°56′36.60″	106°22′4.86″		22.9	8.071	172.8	7.7	6	1.42	0.03
25	24	28°58′28.35″	106°20′47.94″		23.1	7.886	179.5	6.5	7	1.42	0.04
26	25	28°59′22.94″	106°20′53.34″		24	8.061	174.4	7.9	11	1.47	0.04
27	26	29°0′22.70″	106°19′34.23″		26	7.958	176	7.8	8	1.62	0.05
28	27	29°1′19.45″	106°19′10.31″		24.2	8.338	175.4	8.5	8	1.53	0.06
29	28	29°2′35.14″	106°18′40.66″		24.7	8.051	204	7.7	8	1.91	0.06
31	29	29°4′24.55″	106°19′44.24″		26.5	7.766	189.6	7.3	8	1.59	0.07
32	30	29°5′20.21″	106°19′12.18″		21.6	7.619	195.9	6.7	9	2.7	0.06
33	31	29°6′40.94″	106°18′27.00″		23	7.978	188.4	6.9	6	2.6	0.05
34	32	29°7′24.03″	106°18′5.86″		22.4	7.804	188.9	7	6	2.57	0.05
35	33	29°8′0.95″	106°17′56.66″		24.2	7.876	187.2	6.8	7	2.58	0.06
36	34	29°8′54.56″	106°17′46.44″		22.4	7.896	197.4	6.4	9	2.68	0.06
37	35	29°9′13.63″	106°16′45.51″		23.3	7.978	202	7	11	2.84	0.08
38	36	29°10′6.34″	106°16′48.93″		23.4	7.886	200	7.2	10	2.64	0.06
39	37	29°9′47.61″	106°18′7.77″		24.2	7.968	202	7.4	6	2.71	0.07
40	38	29°9′47.53″	106°19′42.92″		25.2	7.866	450	7.4	11	3.67	0.04
41	39	29°10′59.87″	106°20′20.05″		22.1	7.896	210	6.8	8	2.78	0.08
42	40	29°11′58.88″	106°20′50.47″		22.2	8.358	204	6.5	9	3.13	0.08
43	41	29°12′49.80″	106°21′30.45″		22.4	8.177	209	6.4	8	3.09	0.1
44	42	29°13′53.08″	106°21′59.38″		22.3	8.266	310	7.3	7	3.16	0.06
14	43	28°47′32.31″	106°20′22.24″		17.5	8.306	211	7.4	4L	1.35	0.02
30	44	29°3′16.37″	106°19′49.30″		28.2	8.071	201	6.5	11	1.75	0.06
45	45	28°46′50.45″	106°18′52.34"		19	7.741	120.9	8.5	4L	1.19	0.01
46	46	28°48′20.84″	106°16′41.86″		20.6	8.368	160.4	7.8	4L	1.28	0.02
47	47	28°49′19.63″	106°18′41.57″		21.4	7.998	137.6	8.3	4L	1.17	0.01
48	48	28°45′29.15″	106°25′22.05″		18.9	8.111	205	6.9	6	1.09	0.04
49	49	28°48′51.51″	106°22′14.65″		21.4	8.276	211	7.4	6	1.27	0.04
50	50	28°51′4.24″	106°20′37.88″		20.4	7.824	219	7.5	6	1.46	0.04
51	51	28°55′37.86″	106°18′37.87″		21	7.998	249	6.4	6	2.56	0.1
52	52	28°57′51.12″	106°17′30.06″		22.5	8.081	487	5.1	13	3.22	0.26
53	53	28°59′27.86″	106°15′48.09″		23.2	8.256	231	7.2	4	2.52	0.04

## Sheet: seventh202106
point	latitude	longitude		water temperature （℃）	pH	EC（us/cm）	DO（mg/L）	COD（mg/L）	TN（mg/L）	TP(mg/L)
1	28°37′50.53″	106°25′2.42″		24	10	82.9	7	1.51	1.119	0.065246
2	28°38′41.00″	106°24′27.68″		23.8	9.5	122.5	6.7	1.51	1.138	0.017271
3	28°39′48.56″	106°24′2.68″		22.3	9.2	270	7.1	6.02	2.428	0.071003
4	28°40′36.11″	106°23′52.35″		22.5	9.3	242	6	1.51	1.633	0.047975
5	28°41′3.96″	106°23′37.42″		22.4	9.2	247	8.3	1.51	1.52	0.047975
6	28°41′44.33″	106°23′34.04″		23.5	8.9	248	6.9	1.51	0.94	0.03838
7	28°42′11.46″	106°23′26.52″		23.5	9.1	219	7.2	1.51	1.49	0.024947
8	28°42′48.86″	106°23′12.10″		23.5	9.2	224	8.86	1.51	0.95	0.01919
9	28°43′50.07″	106°22′57.82″		25	9.1	263	6	1.51	1.36	0.036461
10	28°44′16.80″	106°22′48.10″		25.7	9	251	7.3	1.51	0.92	0.030704
11	28°45′15.41″	106°22′48.10″		25.9	9.1	243	6.8	7.52	0.44	0.061408
12	28°45′53.63″	106°21′53.10″		25.9	9.3	243	7.1	7.52	0.55	0.026866
13	28°46′18.65″	106°21′30.19″		25	9	285	6.5	7.52	0.37	0.034542
14	28°48′42.45″	106°19′39.73″		25.4	8.9	278	7.2	9.03	0.48	0.03838
15	28°49′55.97″	106°19′12.65″		25.6	8	304	6.5	6.02	0.42	0.126654
16	28°50′22.22″	106°19′24.02″		27.1	9.2	214	6.4	9.03	0.46	0.040299
17	28°51′23.33″	106°19′53.95″		28.7	9.1	216	8	9.03	0.62	0.05757
18	28°52′47.12″	106°20′5.02″		31.7	9	217	10	7.52	0.55	0.099788
19	28°53′15.94″	106°20′48.14″		30.2	8.8	238	9.2	9.03	0.61	0.051813
20	28°53′58.93″	106°20′43.77″		28.9	9	241	8.7	7.52	0.51	0.042218
21	28°54′38.35″	106°22′3.10″		28.5	9.1	238	7.9	7.52	0.62	0.044137
22	28°55′47.31″	106°22′4.08″		28.4	9	243	9.6	10.53	0.64	0.042218
23	28°56′36.60″	106°22′4.86″		27.8	9.1	233	8.8	6.02	0.73	0.036461
24	28°58′28.35″	106°20′47.94″		29	8.4	242	5.7	1.51	0.72	0.03838
25	28°59′22.94″	106°20′53.34″		25.4	8.5	299	8.6	6.02	0.72	0.040299
26	29°0′22.70″	106°19′34.23″		27	9.4	222	7.9	6.02	1.12	0.034542
27	29°1′19.45″	106°19′10.31″		26.1	9	218	8.8	9.03	0.97	0.030704
28	29°2′35.14″	106°18′40.66″		26.4	8.5	221	6.9	1.51	1.05	0.101707
29	29°4′24.55″	106°19′44.24″		27	8.8	238	5.7	3.01	1.05	0.034542
30	29°5′20.21″	106°19′12.18″		27.7	8.5	238	7.2	1.51	0.83	0.049894
31	29°6′40.94″	106°18′27.00″		28	8.7	248	7.8	6.02	0.88	0.032623
32	29°7′24.03″	106°18′5.86″		27.6	8.8	233	8.2	7.52	0.5	0.05757
33	29°8′0.95″	106°17′56.66″		28.3	8.7	236	9.1	9.03	1.19	0.034542
34	29°8′54.56″	106°17′46.44″		29	8.9	233	7.2	4.51	1.16	0.088274
35	29°9′13.63″	106°16′45.51″		29.6	8.6	236	6.8	4.51	1.08	0.040299
36	29°10′6.34″	106°16′48.93″		31.5	9.1	224	8.9	1.51	0.94	0.028785
37	29°9′47.61″	106°18′7.77″		30.9	8.5	228	8.6	3.01	1.12	0.03838
38	29°9′47.53″	106°19′42.92″		28.2	8.8	264	6.9	6.01	1.1	0.044137
39	29°10′59.87″	106°20′20.05″		31	8.6	261	8.9	9.03	1.36	0.067165
40	29°11′58.88″	106°20′50.47″		29.2	8.2	646	7.8	7.52	1.05	0.046056
41	29°12′49.80″	106°21′30.45″		31	8	272	8.2	3.01	1.34	0.07676
42	29°13′53.08″	106°21′59.38″		31.1	9.2	269	9.7	3.01	1.21	0.051813
43	28°47′32.31″	106°20′22.24″		28.8	9.3	272	9.4	1.51	1.1	0.176548
44	29°3′16.37″	106°19′49.30″		29.6	9.1	400	9.8	1.51	1.23	0.024947
45	28°46′50.45″	106°18′52.34"		25.4	8.9	178.8	8.7	4.51	0.92	0.042218
46	28°48′20.84″	106°16′41.86″		25.7	9	231	8.4	1.51	0.92	0.036461
47	28°49′19.63″	106°18′41.57″		27.2	8.7	253	8.6	4.51	0.77	0.034542
48	28°45′29.15″	106°25′22.05″		28.4	9.2	254	7.4	1.51	0.5	0.040299
49	28°48′51.51″	106°22′14.65″		29.3	9.1	245	7.1	2.51	0.59	0.03838
50	28°51′4.24″	106°20′37.88″		30.1	9.2	254	7.3	3.51	0.61	0.092112
51	28°55′37.86″	106°18′37.87″		24.4	8.7	325	8.2	4.51	1.36	0.126654
52	28°57′51.12″	106°17′30.06″		23.7	91	497	7.8	5.51	2.6	0.17271
53	28°59′27.86″	106°15′48.09″		25.3	8.5	254	7	6.51	0.83	0.028785
